# Supplementary material for: Sec13 promotes oligodendrocyte differentiation and myelin repair through autocrine pleiotrophin signaling
Source: JCI journal article supplement (doi:10.1172/jci155096), 2022-02-10
Supplement: sd1 [file 1]

301 Moved Permanently

# Moved Permanently

The document has moved here.
