# Supplementary material for: Sec13 promotes oligodendrocyte differentiation and myelin repair through autocrine pleiotrophin signaling
Source: JCI journal article supplement (doi:10.1172/jci155096), 2022-02-10
Supplement: sd1 [file 1]

## Supplemental Information

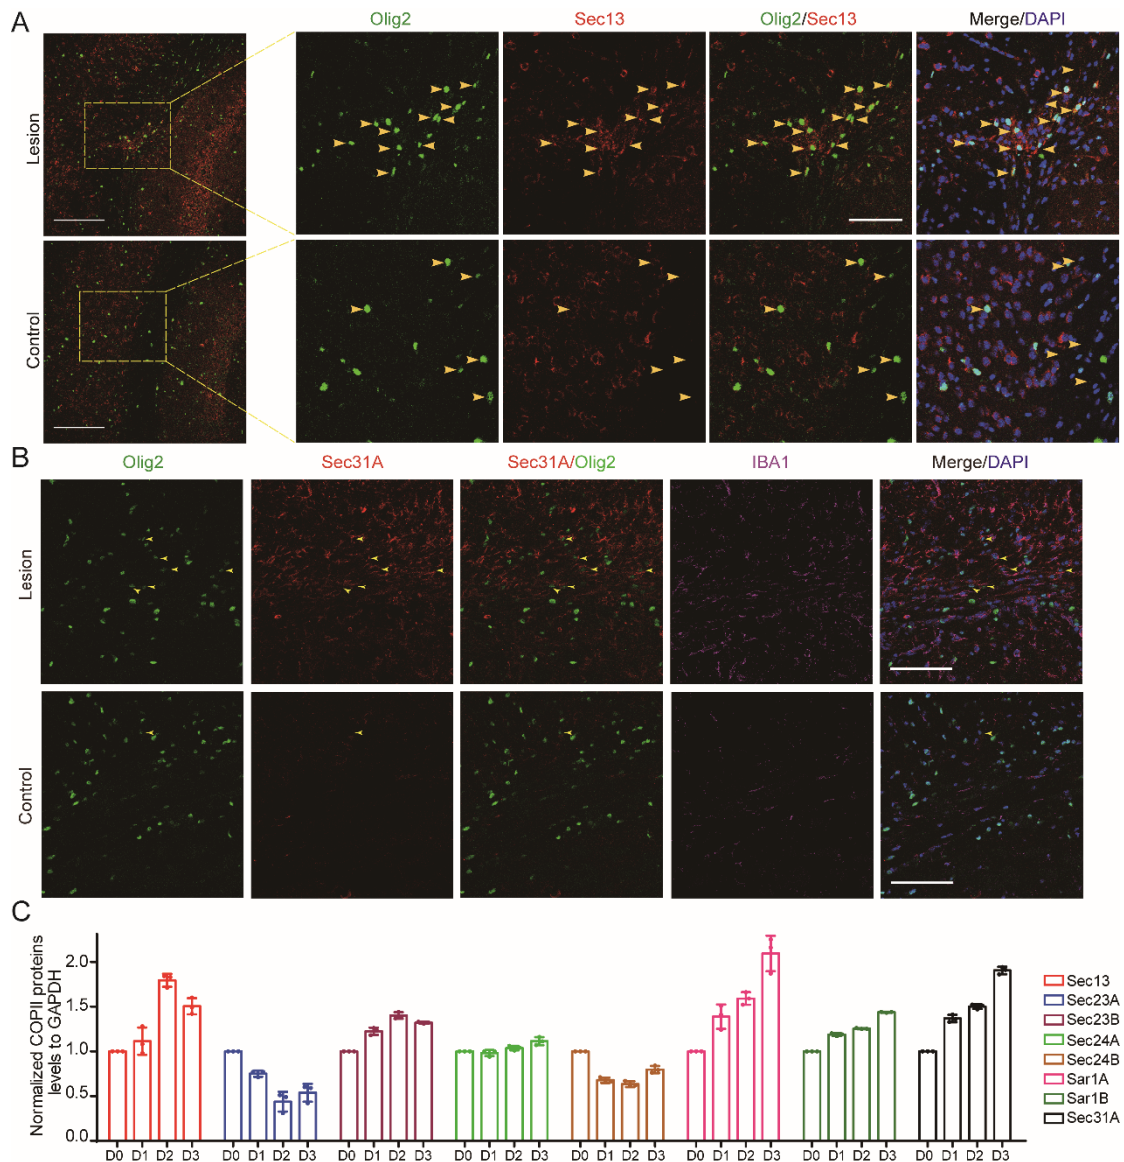

### Supplemental Figure 1. COPII complex is implicated in remyelination after demyelination.

(A) Immunostaining of Olig2 and Sec13 at 7 dpl in corpus callosum from non-lesion control and EB lesion mice. Boxed area is shown on the right. Arrowheads indicate Olig2<sup>+</sup> cells. Scale bars represent 200  $\mu$ m in left and 80  $\mu$ m in right.

(B) Immunostaining of Olig2, Sec31A and IBA1 at 7 dpl in corpus callosum from non-lesion control and EB lesion mice. Arrowheads indicate Olig2<sup>+</sup> cells. Scale bars represent 100  $\mu$ m.

(C) Histograms show fold changes of COPII components measured by densitometry after normalization with GAPDH (n= 3 independent experiments, D, day after differentiation).

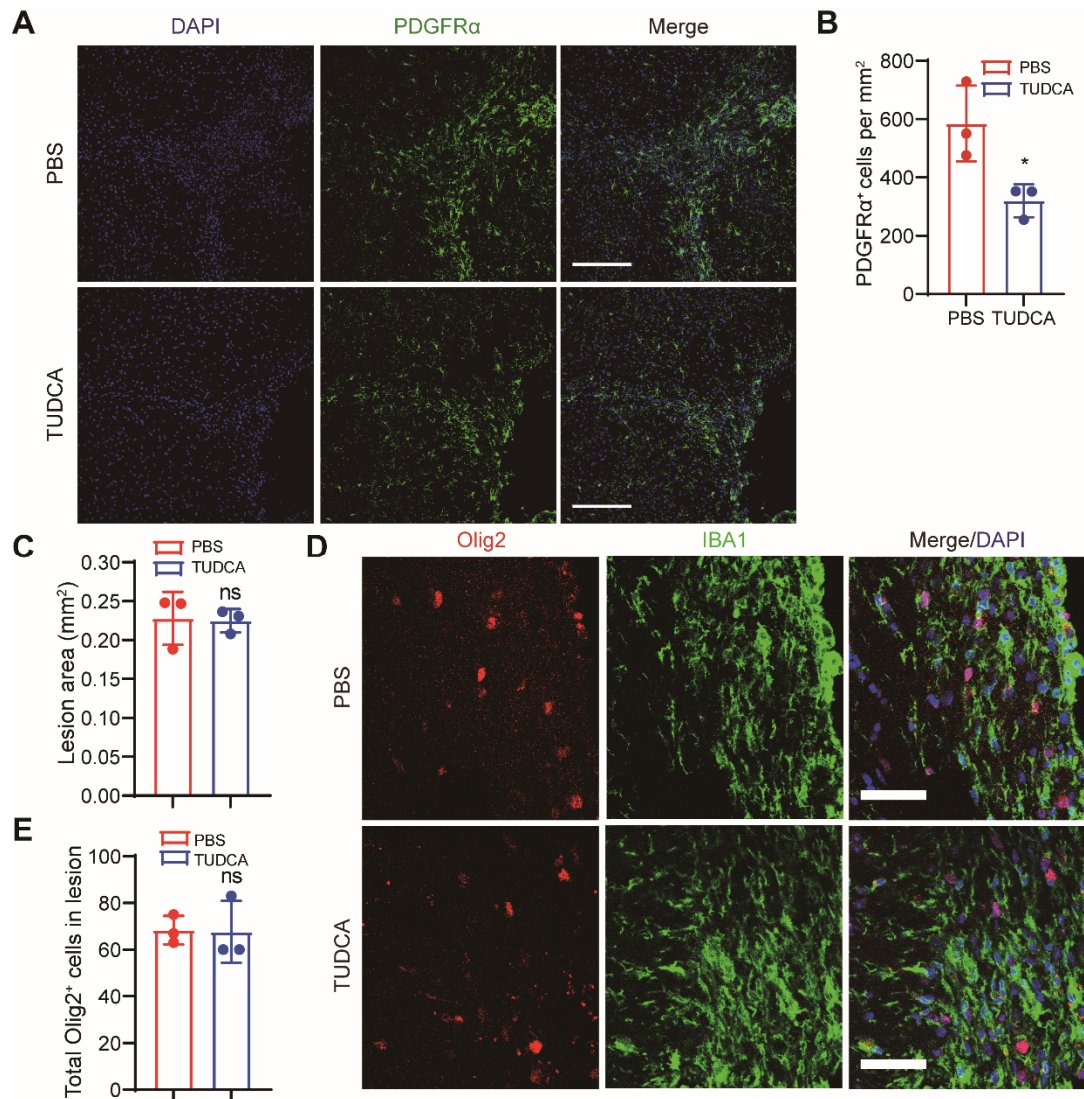

**Supplemental Figure 2. The number of oligodendrocyte lineage cells appear unaltered after TUDCA treatment.**

(A) Immunostaining of PDGFR $\alpha$  in corpus callosum lesions of control and TUDCA-treated mice at 10 dpl. Scale bars represent 200  $\mu$ m.

(B) Quantification of PDGFR $\alpha$ + cells in LPC lesion sites (n= 3 animals/treatment).

(C) Quantification of lesion area in LPC lesion sites of control and TUDCA-treated mice at 10 dpl (n= 3 animals/treatment).

(D) Immunostaining of Olig2 and IBA1 in corpus callosum lesions of control and TUDCA-treated mice at 10 dpl. Scale bars represent 50  $\mu$ m.

(E) Quantification of Olig2+ cells in LPC lesion sites of control and TUDCA-treated mice at 10 dpl (n= 3 animals/treatment). Data are represented mean  $\pm$  SD; \*P<0.05, two-tailed unpaired Student's t test.

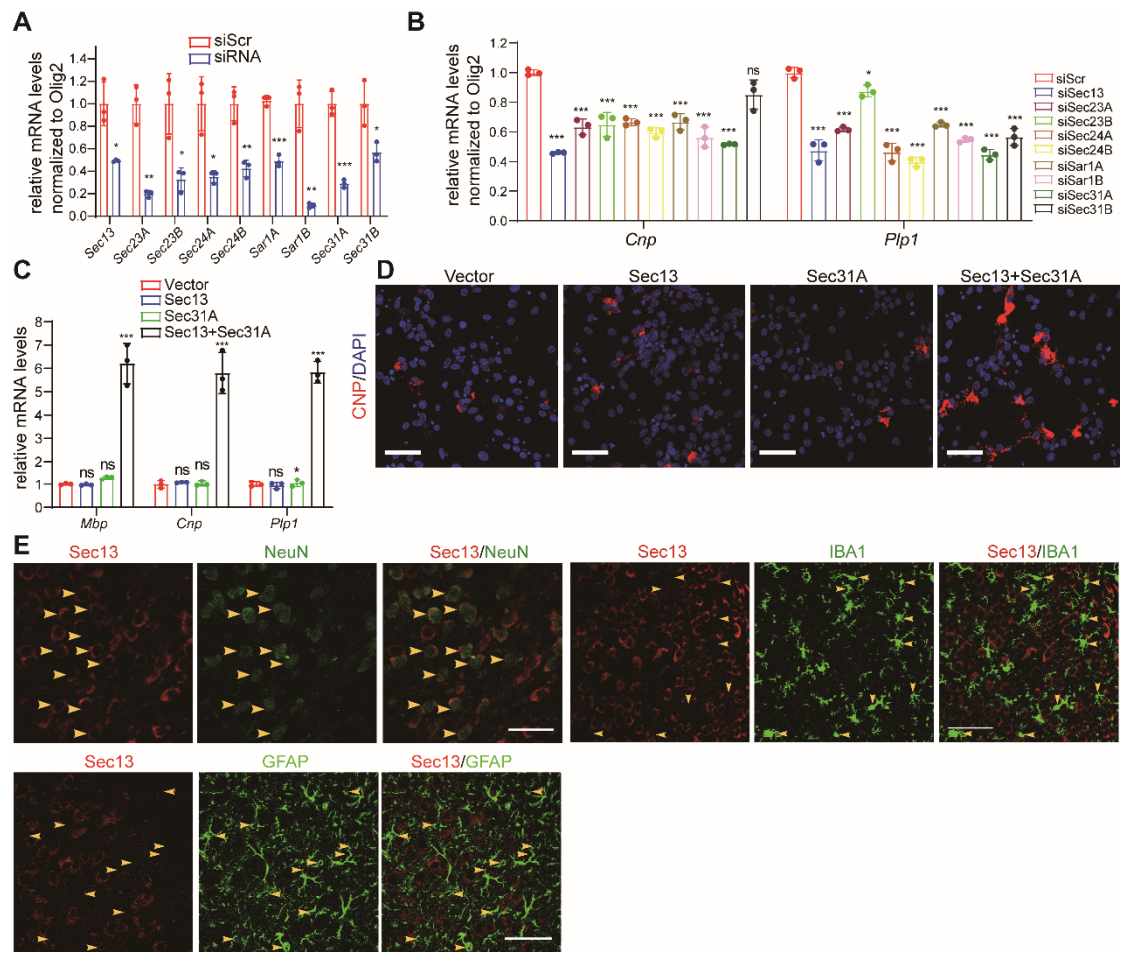

**Supplemental Figure 3. COPII components are necessary for oligodendrocyte differentiation.**

(A) Real-time PCR analysis of COPII components in primary rat OPCs following treatment with scrambled or indicated siRNAs, respectively (n=3 independent experiments). Data were analyzed by two-tailed unpaired Student's *t* test.

(B) Real-time PCR analysis of *Cnp* and *Plp1* expression in primary rat OPCs under differentiation conditions following treatments with indicated siRNAs (n=3 independent experiments). Data were analyzed by 1-way ANOVA with Tukey's correction for multiple comparisons.

(C-D) Real-time PCR analysis of myelination-associated genes (C) and immunostaining of CNP (D) in primary rat OPCs under differentiation conditions following transfection with Sec13 or Sec31A or Sec13 plus Sec31A construct (n=3 independent experiments). Scale bars represent 50  $\mu$ m. Data were analyzed by 1-way ANOVA with Tukey's correction for multiple comparisons.

(E) Immunostaining of Sec13, neuron marker NeuN, astrocyte marker GFAP and microglia marker IBA1 in the cortex adjacent to corpus callosum (Sec13/NeuN) or corpus callosum (Sec13/GFAP/IBA1) of mice at P14. Scale bars represent 30  $\mu$ m. Data are represented mean  $\pm$  SD. \*P<0.05, \*\*P<0.01, \*\*\*P<0.001.

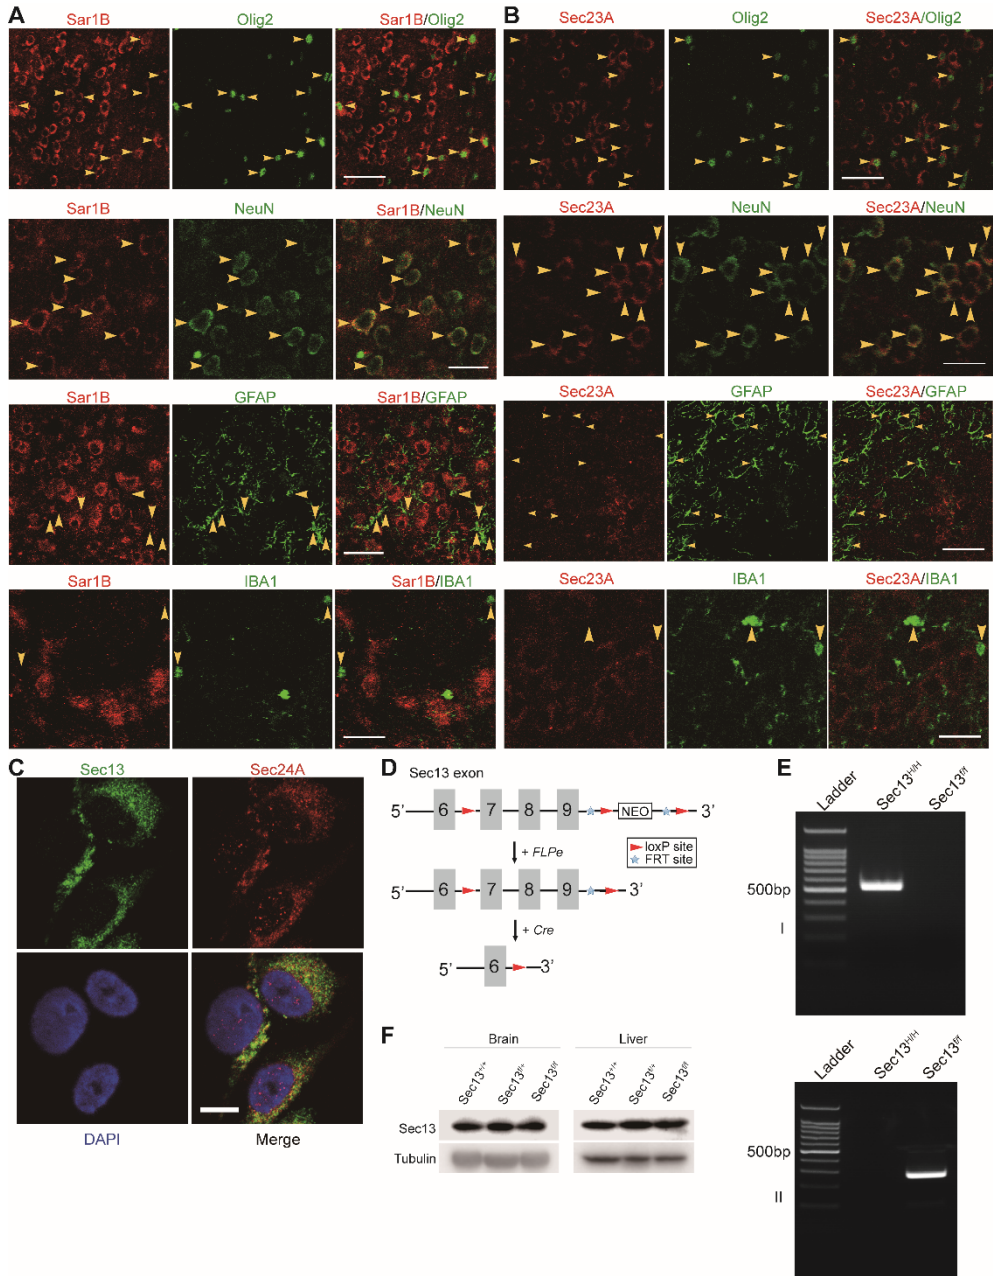

**Supplemental Figure 4. COPII components are expressed in neurons and oligodendrocytes, but not in astrocyte and microglia.**

(A-B) Immunostaining of Sar1B (A) or Sec23A (B) with NeuN, GFAP and IBA1 in the cortex adjacent to corpus callosum (NeuN) or corpus callosum (GFAP/IBA1) of mice at P14. Scale bars represent 30  $\mu\text{m}$ .

(C) Co-immunostaining of Sec13 with Sec24A in primary rat differentiating immature oligodendrocytes. Scale bars represent 10  $\mu\text{m}$ .

(D) Schematic diagram depicting the strategy used to remove NEO cassette with FLPe-mediated excision and Cre-mediated excision of the floxed *Sec13*. LoxP sites flanking exon 7 and 9 of *Sec13* are indicated.

(E) Genotyping was performed with primer sets that detect: (I) the allele containing NEO cassette; (II) the allele deleted of NEO cassette.

(F) Immunoblotting of indicated proteins in brain and liver lysate from adult P120 wild-type, *Sec13*<sup>fllox/+</sup>, and *Sec13*<sup>fllox/fllox</sup> mice.

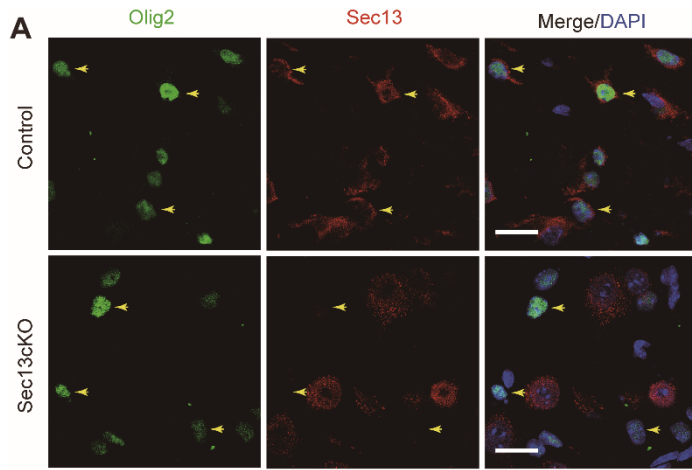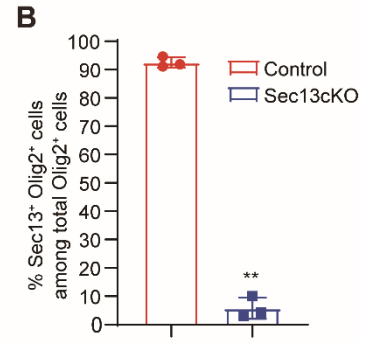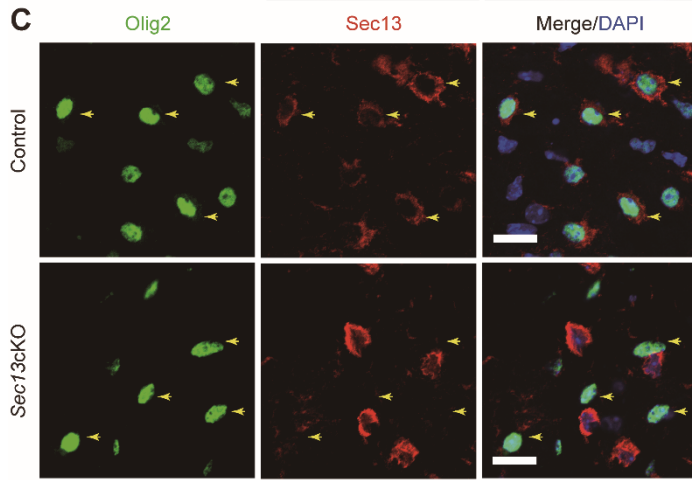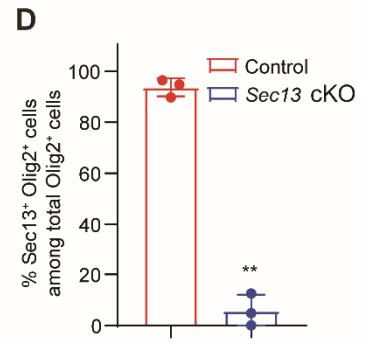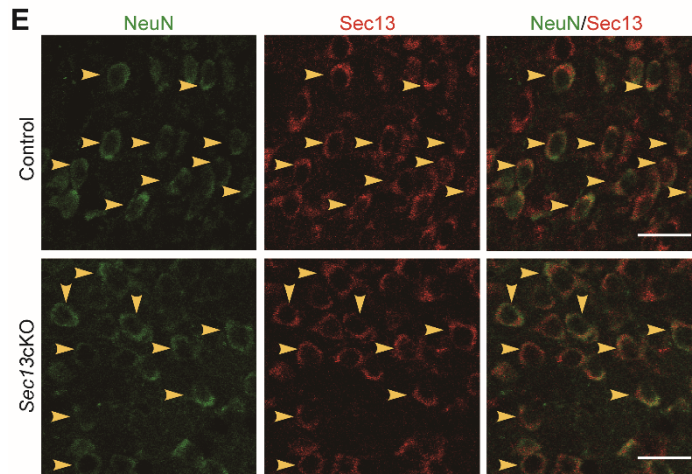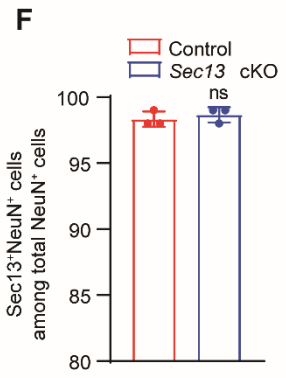

**Supplemental Figure 5. Sec13 is efficiently ablated in oligodendrocyte lineage.**

(A) Immunostaining of Olig2 and Sec13 in the spinal cord of control and *Sec13cKO* mice at P14. Arrowheads indicate the Olig2<sup>+</sup> cells. Scale bars represent 50  $\mu$ m.

(B) Quantification of Sec13<sup>+</sup> Olig2<sup>+</sup> cells as a percentage of total Olig2<sup>+</sup> cells in the spinal cord at P14 (n= 3 control and 3 mutant animals).

(C) Immunostaining of Olig2 and Sec13 in the corpus callosum of control and *Sec13cKO* mice at P14. Arrowheads indicate the Olig2<sup>+</sup> cells. Scale bars represent 20  $\mu$ m.

(D) Quantification of Sec13<sup>+</sup> Olig2<sup>+</sup> cells as a percentage of total Olig2<sup>+</sup> cells in the corpus callosum at P14 (n= 3 control and 3 mutant animal).

(E) Immunostaining of NeuN and Sec13 in the cortex adjacent to corpus callosum of control and *Sec13cKO* mice at P14. Arrowheads indicate the NeuN<sup>+</sup>/Sec13<sup>+</sup> cells. Scale bars represent 200  $\mu$ m.

(F) Quantification of Sec13<sup>+</sup> NeuN<sup>+</sup> cells as a percentage of total NeuN<sup>+</sup> cells in the cortex adjacent to corpus callosum of control and mutant mice at P14 (n= 3 control and 3 mutant animal). Data are represented as mean  $\pm$  SD; \*\* $P$ <0.01, two-tailed unpaired Student's  $t$  test.



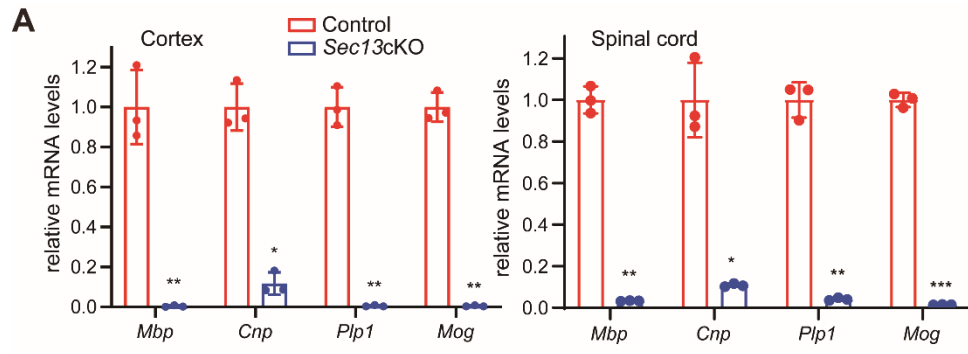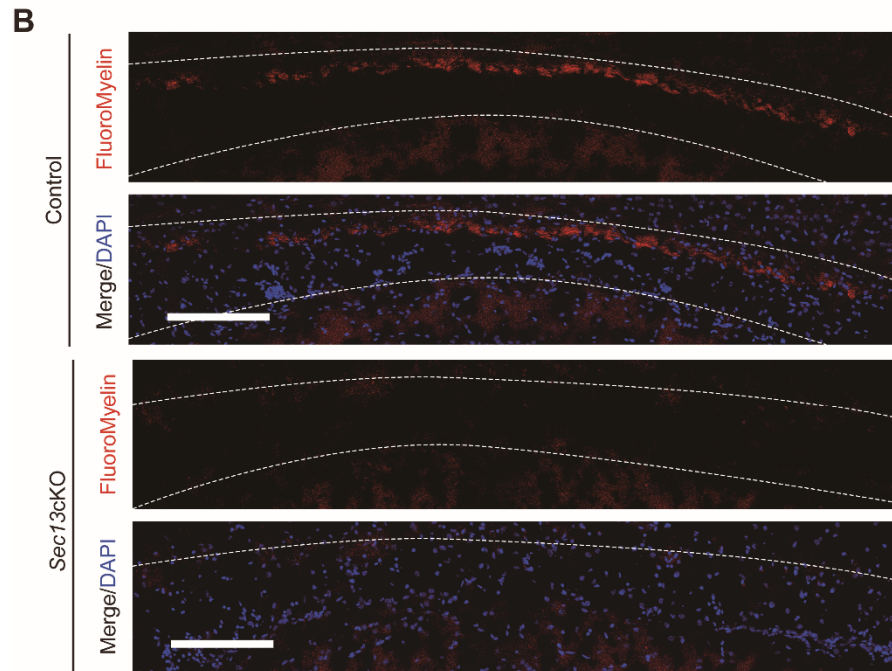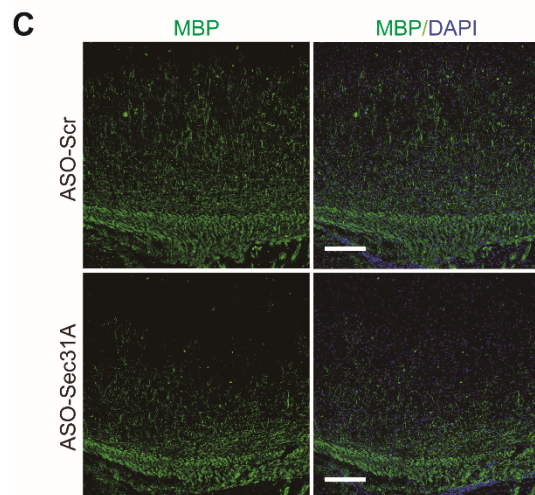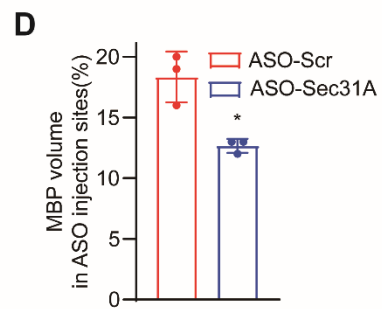

**Supplemental Figure 6. COPII components is required for myelination.**

(A) Real-time PCR analysis of myelination-associated genes in cortex (left) and spinal cord (right) of control and *Sec13cKO* at P14 (n= 3 control and 3 mutant animals).

(B) Images of corpus callosum stained with FluoroMyelin-red in control and *Sec13cKO* at P14. Scale bars represent 200  $\mu\text{m}$ .

(C) Immunostaining of MBP in corpus callosum and cortex of ASO-Scr and ASO-Sec31A injected mice at P14. Scr=scramble. Scale bars represent 200  $\mu\text{m}$ .

(D) Quantification of MBP<sup>+</sup> volume in ASO-Scr and ASO-Sec31A injected mice (n= 3 animals/treatment). Data are represented as mean  $\pm$  SD; \* $P$ <0.05, \*\* $P$ <0.01, \*\*\* $P$ <0.001, two-tailed unpaired Student's  $t$  test.

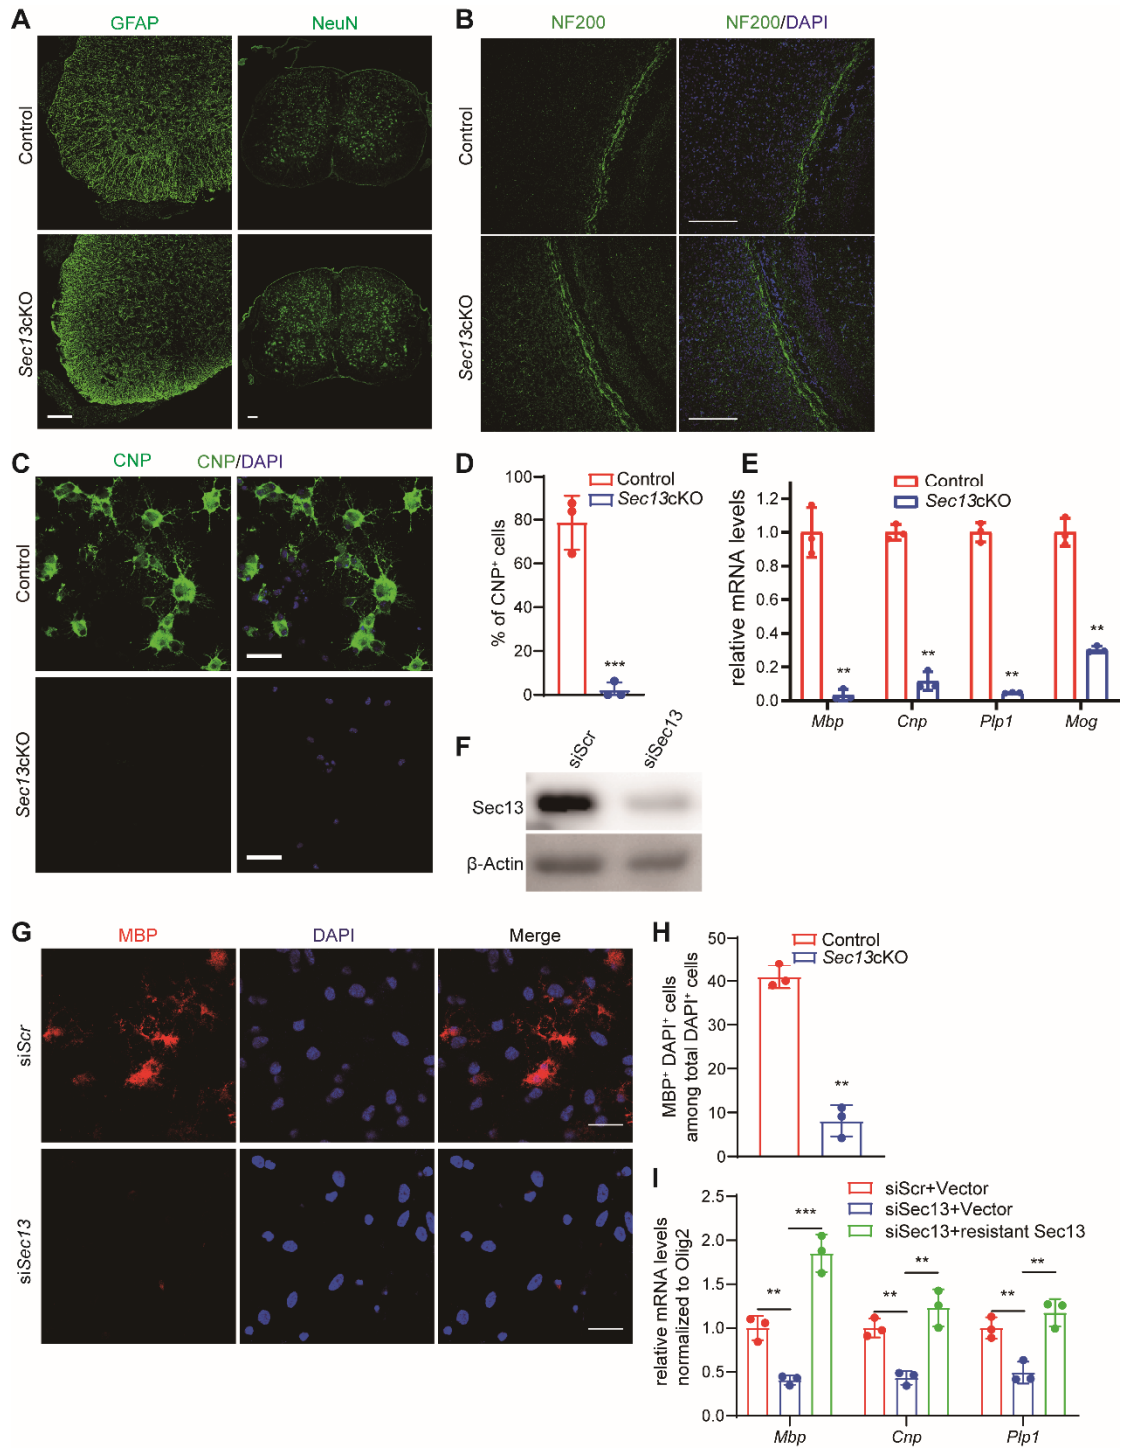

**Supplemental Figure 7. Sec13 deletion in the OL lineage does not affect the development of other neural cell types in the brain, but inhibits OL differentiation.**

(A-B) Immunostaining of astrocyte marker GFAP, neuron marker NeuN in the spinal cords of control and *Sec13cKO* at P14. Scale bars represent 100  $\mu\text{m}$ .

(B) Immunostaining of NF200 in the corpus callosum of control and *Sec13cKO* mice at P14. Scale bars represent 200  $\mu\text{m}$ .

(C-D) Immunolabeling (C) and quantification (D) of CNP in control and *Sec13cKO* primary OPCs under differentiation conditions for 96h (n= 3 animals/treatment). Scale bars represent 50  $\mu\text{m}$ . Data were analyzed two-tailed unpaired Student's *t* test.

(E) Real-time PCR analysis of myelination-associated genes in control and *Sec13cKO* primary OPCs under differentiation conditions (n= 3 independent experiments). Data were analyzed two-tailed unpaired Student's *t* test.

(F) Immunoblotting validation of knockdown efficiency of Sec13 in primary rat OPCs treated with scrambled or *Sec13* siRNAs.

(G-H) Immunolabeling (G) and quantification (H) of MBP in primary rat OPCs under differentiation conditions for 72hours following treatments with scrambled or *Sec13* siRNAs (n= 3 independent experiments). Scale bars represent 25  $\mu\text{m}$ . SCR, scrambled.

(I) Real-time PCR analysis of myelination-associated genes in primary rat OPCs under differentiation conditions for 48hours following treatments with scrambled or *Sec13* siRNAs with control vector or vectors overexpressing resistant *Sec13* (n= 3 independent experiments). Data were analyzed by 1-way ANOVA with Tukey's correction for multiple comparisons. Data are represented as mean  $\pm$  SD; \**P*<0.05, \*\**P*<0.01, \*\*\**P*<0.001.

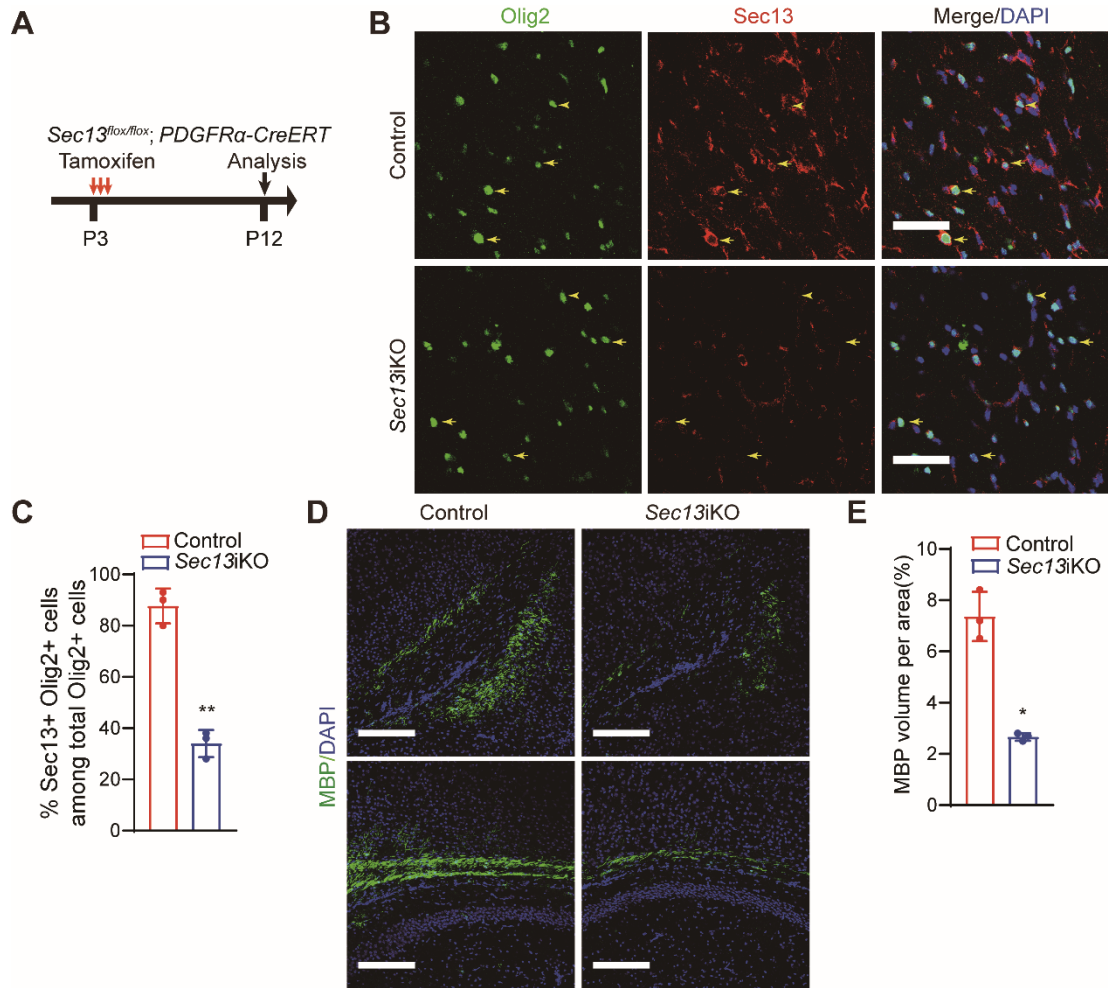

**Supplemental Figure 8. Sec13 is required for myelination in CNS.**

(A) Diagram showing tamoxifen administration to induce *Sec13* deletion.

(B) Immunostaining of Olig2 and *Sec13* in the corpus callosum of control and *Sec13iKO* mice at P12. Scale bars represent 50  $\mu\text{m}$ .

(C) Quantification of *Sec13*<sup>+</sup>Olig2<sup>+</sup> cells as a percentage of total Olig2<sup>+</sup> cells in the corpus callosum of control and *Sec13iKO* mice at P12 (n= 3 control and 3 mutant animals).

(D-E) Immunostaining (D) and quantification (E) of MBP in the corpus callosum of control and *Sec13iKO* mice at P12 (n= 3 control and 3 mutant animals). Scale bars represent 200  $\mu\text{m}$ . Data are represented mean  $\pm$  SD; \* $P$ <0.05, \*\* $P$ <0.01, two-tailed unpaired Student's t test.

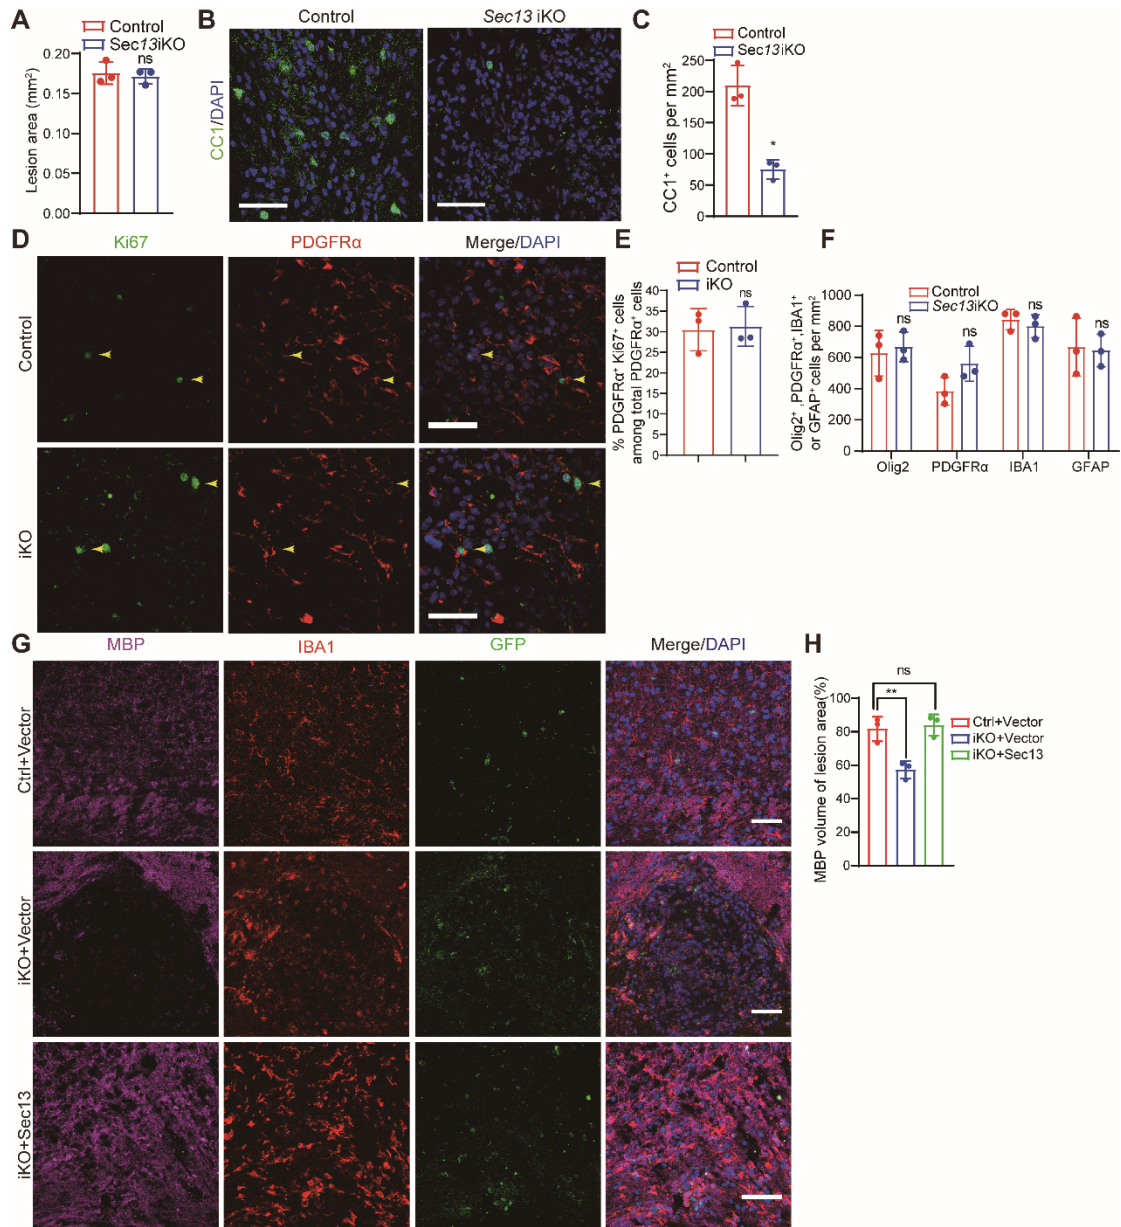

**Supplemental Figure 9. Sec13 is critical for adult remyelination after demyelination.**

(A) Quantification of lesion area in corpus callosum lesions of control and *Sec13*iKO mice at 14 dpl (n= 3 control and 3 mutant animals). Data were analyzed two-tailed unpaired Student's *t* test.

(B and C) Immunostaining (B) and quantification (C) of CC1<sup>+</sup> cells in corpus callosum lesions of control and *Sec13*iKO mice at 14 dpl (n= 3 control and 3 mutant animals). Scale bars represent 50  $\mu$ m. Data were analyzed two-tailed unpaired Student's *t* test.

(D) Immunostaining of Ki67 and PDGFR $\alpha$  in corpus callosum lesions of control and *Sec13* iKO mice at 14 dpl. Arrowheads indicate the Ki67<sup>+</sup>PDGFR $\alpha$ <sup>+</sup> cells. Scale bars represent 50  $\mu$ m.

(E) Quantification of PDGFR $\alpha$ <sup>+</sup> Ki67<sup>+</sup> cells as a percentage of total PDGFR $\alpha$ <sup>+</sup> cells in the corpus callosum lesions of control and *Sec13* iKO mice at 14 dpl (n= 3 control and 3 mutant animals). Data were analyzed two-tailed unpaired Student's *t* test.

(F) Quantification of Olig2<sup>+</sup>, PDGFR $\alpha$ <sup>+</sup>, IBA1<sup>+</sup>, and GFAP<sup>+</sup> cells in the corpus callosum lesions of control and *Sec13*iKO at 14 dpl (n= 3 control and 3 mutant animals). Data were analyzed two-tailed unpaired Student's *t* test.

(G) Immunostaining of MBP, IBA1, and GFP in corpus callosum lesions of control and *Sec13* iKO mice injected with lentivirus expressing GFP or *Sec13*-GFP at 14 dpl. Lentivirus and LPC were focal injected at the same time. Scale bars represent 50  $\mu$ m.

(H) Quantification of MBP<sup>+</sup> volume in corpus callosum lesions of control and *Sec13* iKO mice injected with lentivirus expressing GFP or *Sec13*-GFP at 14 dpl (n= 3 animals/treatment). Data were analyzed by 1-way ANOVA with Tukey's correction for multiple comparisons. Data are represented mean  $\pm$  SD; \**P*<0.05, \*\**P*<0.01.



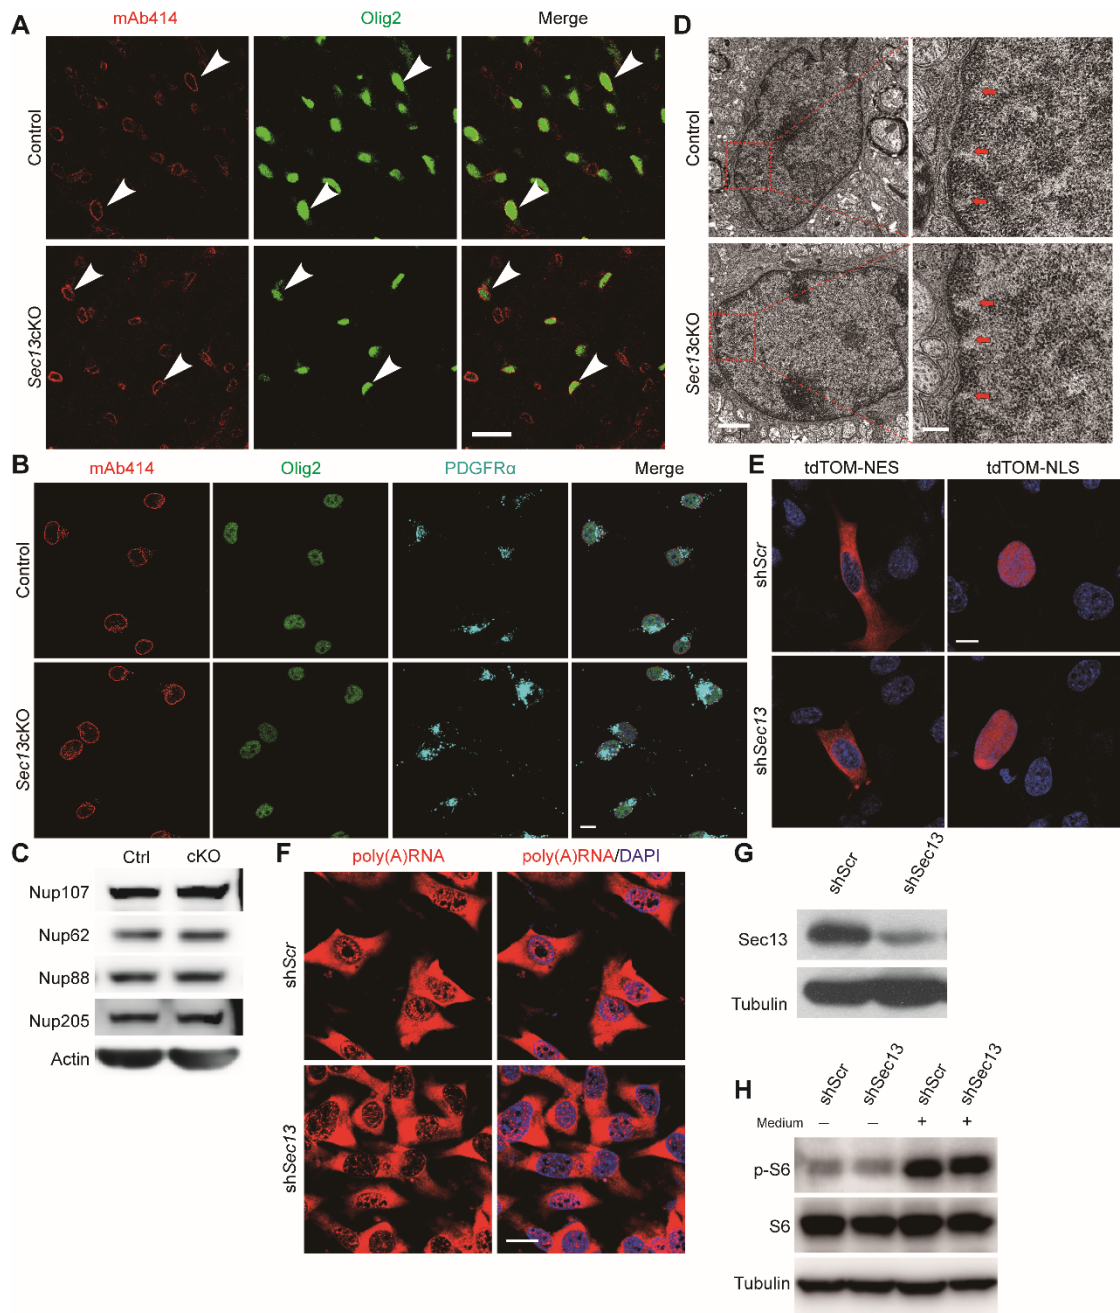

**Supplemental Figure 10. Ablation of Sec13 does not affect nucleocytoplasmic transport.**

(A) Immunostaining of mAb414 and Olig2 in spinal cord of P14 control and *Sec13*cKO mice. Arrowheads indicate mAb414<sup>+</sup>/Olig2<sup>+</sup> cells. Scale bars represent 25  $\mu$ m.

(B) Immunostaining of mAb414, Olig2, and PDGFR $\alpha$  in primary control and *Sec13*cKO OPCs. Scale bars represent 10  $\mu$ m.

(C) Immunoblotting of indicated proteins in the spinal cords lysate of control and *Sec13*cKO at P7. Ctrl: control; cKO: *Sec13*cKO.

(D) Electron microscopy images of oligodendrocytes from control and *Sec13*cKO optic nerves. Boxed image is shown in the right. Arrows indicate NPCs. Scale bars represent 1  $\mu$ m in left panel and 0.2  $\mu$ m in right panel.

(E) Immunofluorescence of tdTomato-NES and tdTomato-NLS signals in Oli-neu cells transduced with scrambled or *Sec13* shRNA. NES, nuclear export signal; NLS, nuclear localization signal. Nuclei are stained with DAPI. Scale bars represent 10  $\mu$ m.

(F) Oligo-dT *In situ* hybridization followed by fluorescence microscopy in Oli-neu cells transduced with scrambled or *Sec13* shRNA. Nuclei are stained with DAPI. Scale bars represent 20  $\mu$ m.

(G) Immunoblotting validation of knockdown efficiency of *Sec13* in Oli-neu cells. shSCR, scrambled shRNA; shSec13, *Sec13* shRNA.

(H) Immunoblotting of indicated proteins in Oli-neu cells transduced with scrambled or *Sec13* shRNA following amino acid-induced activation of mTORC1.

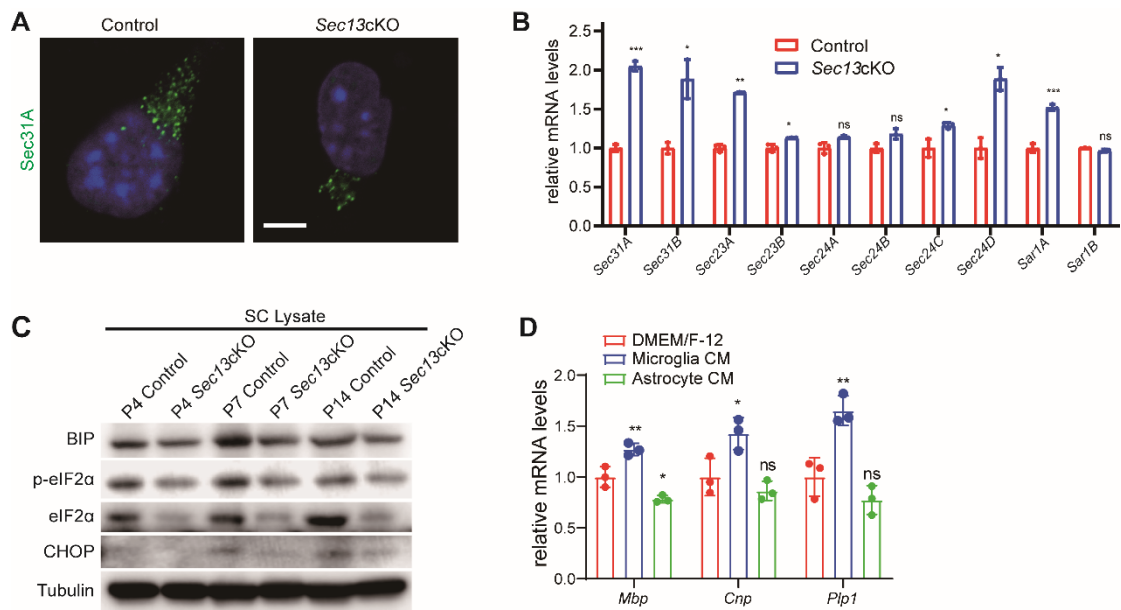

**Supplemental Figure 11. Loss of Sec13 affect other COPII components.**

(A) Immunostaining of Sec31A in control and *Sec13cKO* primary OPCs. Scale bars represent 5  $\mu$ m.

(B) Real-time PCR analysis of COPII components in control and *Sec13cKO* primary OPCs (n=3 independent experiments). Data were analyzed by two-tailed unpaired Student's *t* test.

(C) Immunoblotting of indicated proteins in spinal cord lysate of control and *Sec13cKO* at P4, P7, and P14.

(D) Real-time PCR analysis of myelination-associated genes in primary rat OPCs under differentiation conditions following treatments with DMEM/F-12 or microglia CM or astrocyte CM (n=3 independent experiments). Data were analyzed by 1-way ANOVA with Tukey's correction for multiple comparisons. Data are represented mean  $\pm$  SD; \**P*<0.05, \*\**P*<0.01, \*\*\**P*<0.001.

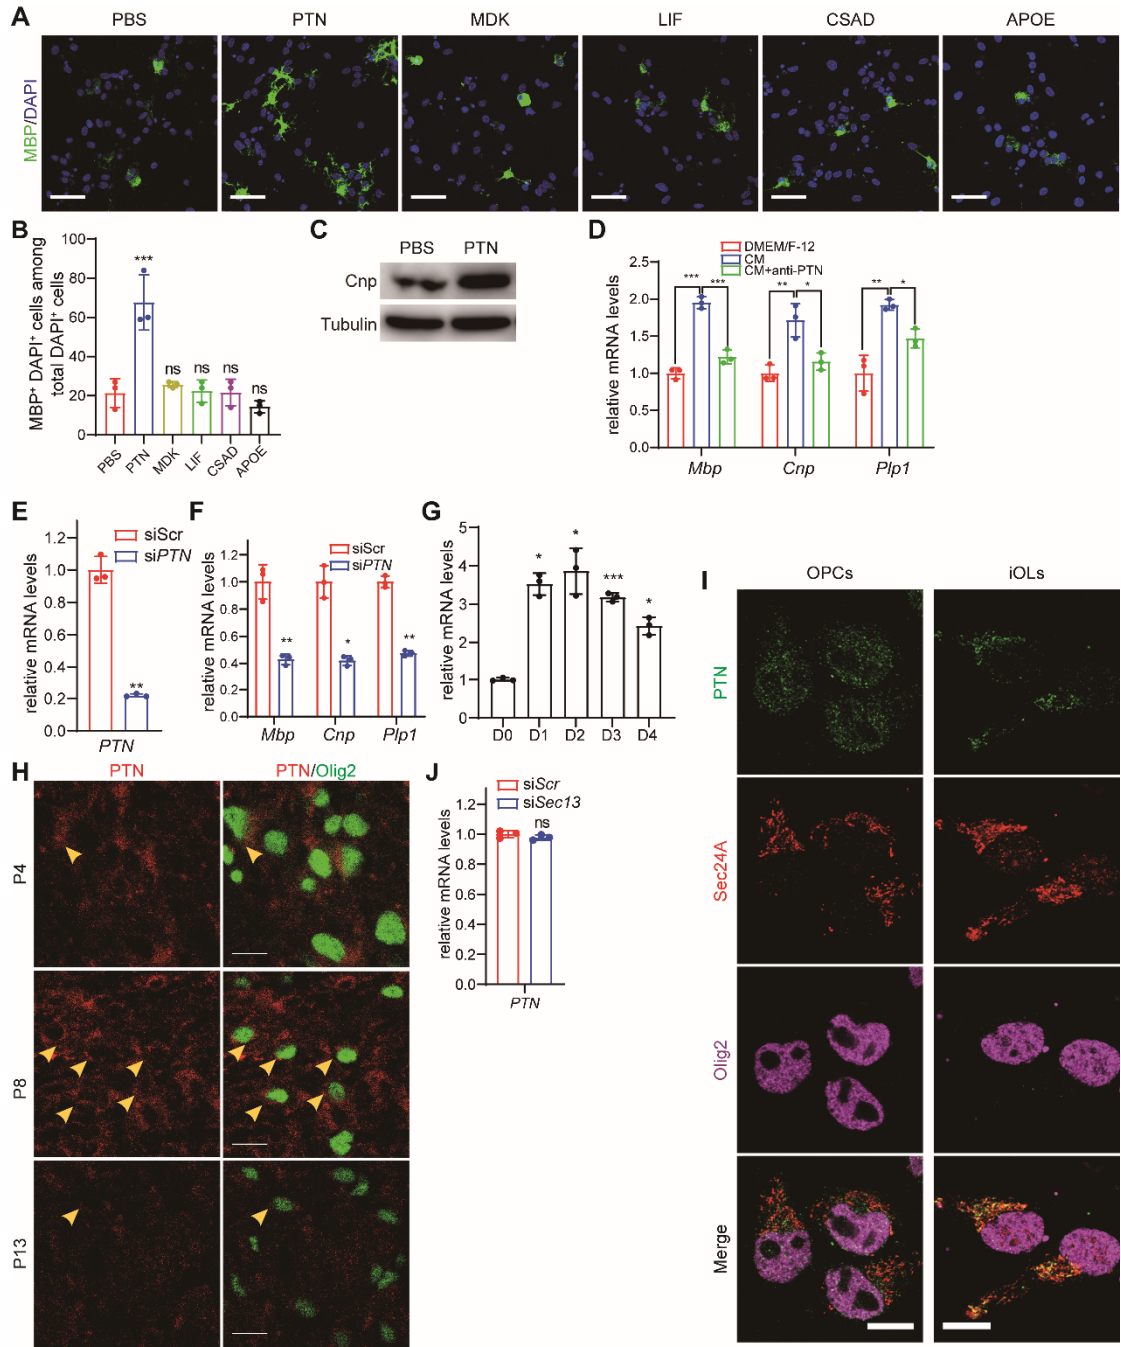

### Supplemental Figure 12. PTN promotes OPC differentiation.

(A-B) Immunolabeling (A) and quantification (B) of MBP in primary rat OPCs under differentiation conditions without T3 for 96 hours following treatments with indicated recombinant proteins (n= 3 independent experiments). Scale bars represent 50  $\mu\text{m}$ .

(C) Immunoblotting of indicated proteins in primary rat OPCs treated with recombinant PTN.

(D) Real-time PCR analysis of myelination-associated genes in primary rat OPCs under differentiation conditions following treatments with DMEM/F-12, or CM, or CM depleted of PTN via immunoprecipitation with anti-PTN antibody (n= 3 independent experiments).

(E) Real-time PCR analysis of *PTN* in primary rat OPCs treated with scrambled or *PTN* siRNAs (n=3 independent experiments).

(F) Real-time PCR analysis of myelination-associated genes in primary rat OPCs under differentiation conditions following treatment with scrambled or *PTN* siRNAs (n=3 independent experiments).

(G) Real-time PCR analysis of *PTN* in primary rat OPCs and differentiating oligodendrocytes after T3 treatment. D, day (n=3 independent experiments).

(H) Immunostaining of PTN with Olig2 in corpus callosum of wild-type mice at P4, P8, and P13. Scale bars represent 30  $\mu\text{m}$ .

(I) Immunostaining of PTN with Olig2 and Sec24A in primary rat OPCs (left) or differentiating immature oligodendrocytes (iOLs, right). Scale bars represent 10  $\mu\text{m}$ .

(J) Real-time PCR analysis of *PTN* in primary rat OPCs treated with scrambled or *Sec13* siRNAs (n=3 independent experiments).

(E, F and J) Data were analyzed by two-tailed unpaired Student's *t* test. (B, D and G) Data were analyzed by 1-way ANOVA with Tukey's correction for multiple comparisons. Data are represented mean  $\pm$  SD; \**P*<0.05, \*\**P*<0.01, \*\*\**P*<0.001.

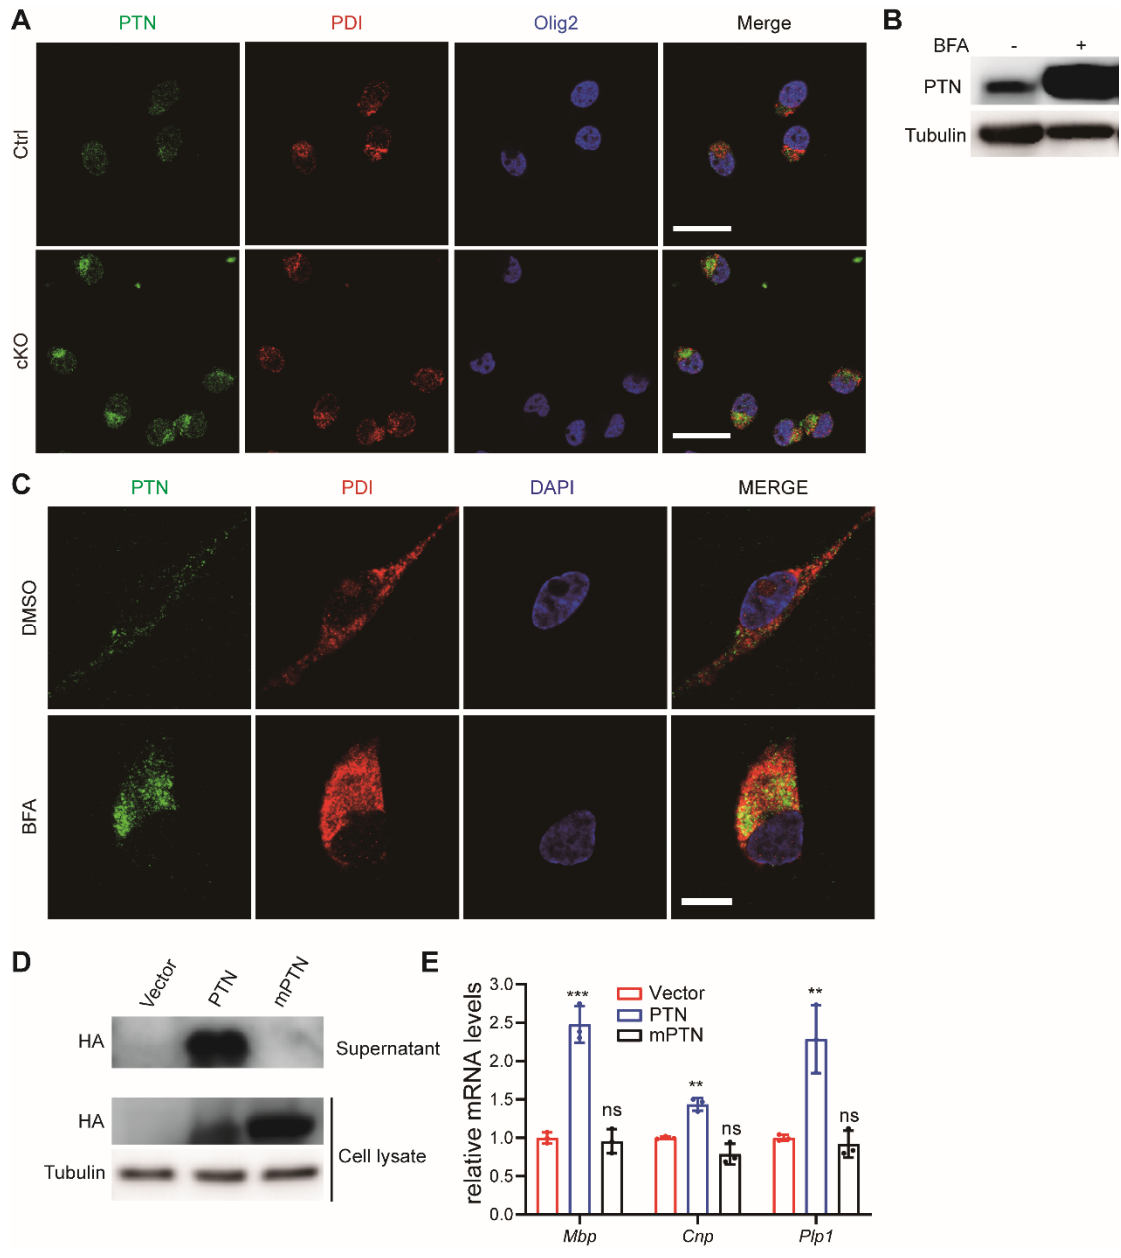

**Supplemental Figure 13. PTN is secreted through COPII regulation.**

(A) Immunostaining of PTN, PDI, and Olig2 in primary control and *Sec13c*KO differentiating immature oligodendrocytes. Scale bars represent 20  $\mu\text{m}$ .

(B) Immunoblotting of indicated proteins in primary rat OPCs treated with BFA (0.5  $\mu\text{g}/\mu\text{L}$ ) for 24h.

(C) Immunostaining of PTN and PDI in primary rat differentiating immature oligodendrocytes in the presence or absence of BFA (0.5  $\mu\text{g}/\mu\text{L}$ ) for 24h. Scale bars represent 10  $\mu\text{m}$ .

(D) Immunoblotting of indicated proteins in culture medium (upper, supernatant) and cell lysate (lower) from primary rat OPCs transfected with HA-PTN or HA-PTN mutant (L18&20R) construct.

(E) Real-time PCR analysis of myelination-associated genes in primary rat OPCs under differentiation conditions following PTN or PTN mutant (L18&20R) over expression (n=3 independent experiments). Data were analyzed by 1-way ANOVA with Tukey's correction for multiple comparisons. Data are represented mean  $\pm$  SD; \*\* $P$ <0.01, \*\*\* $P$ <0.001.

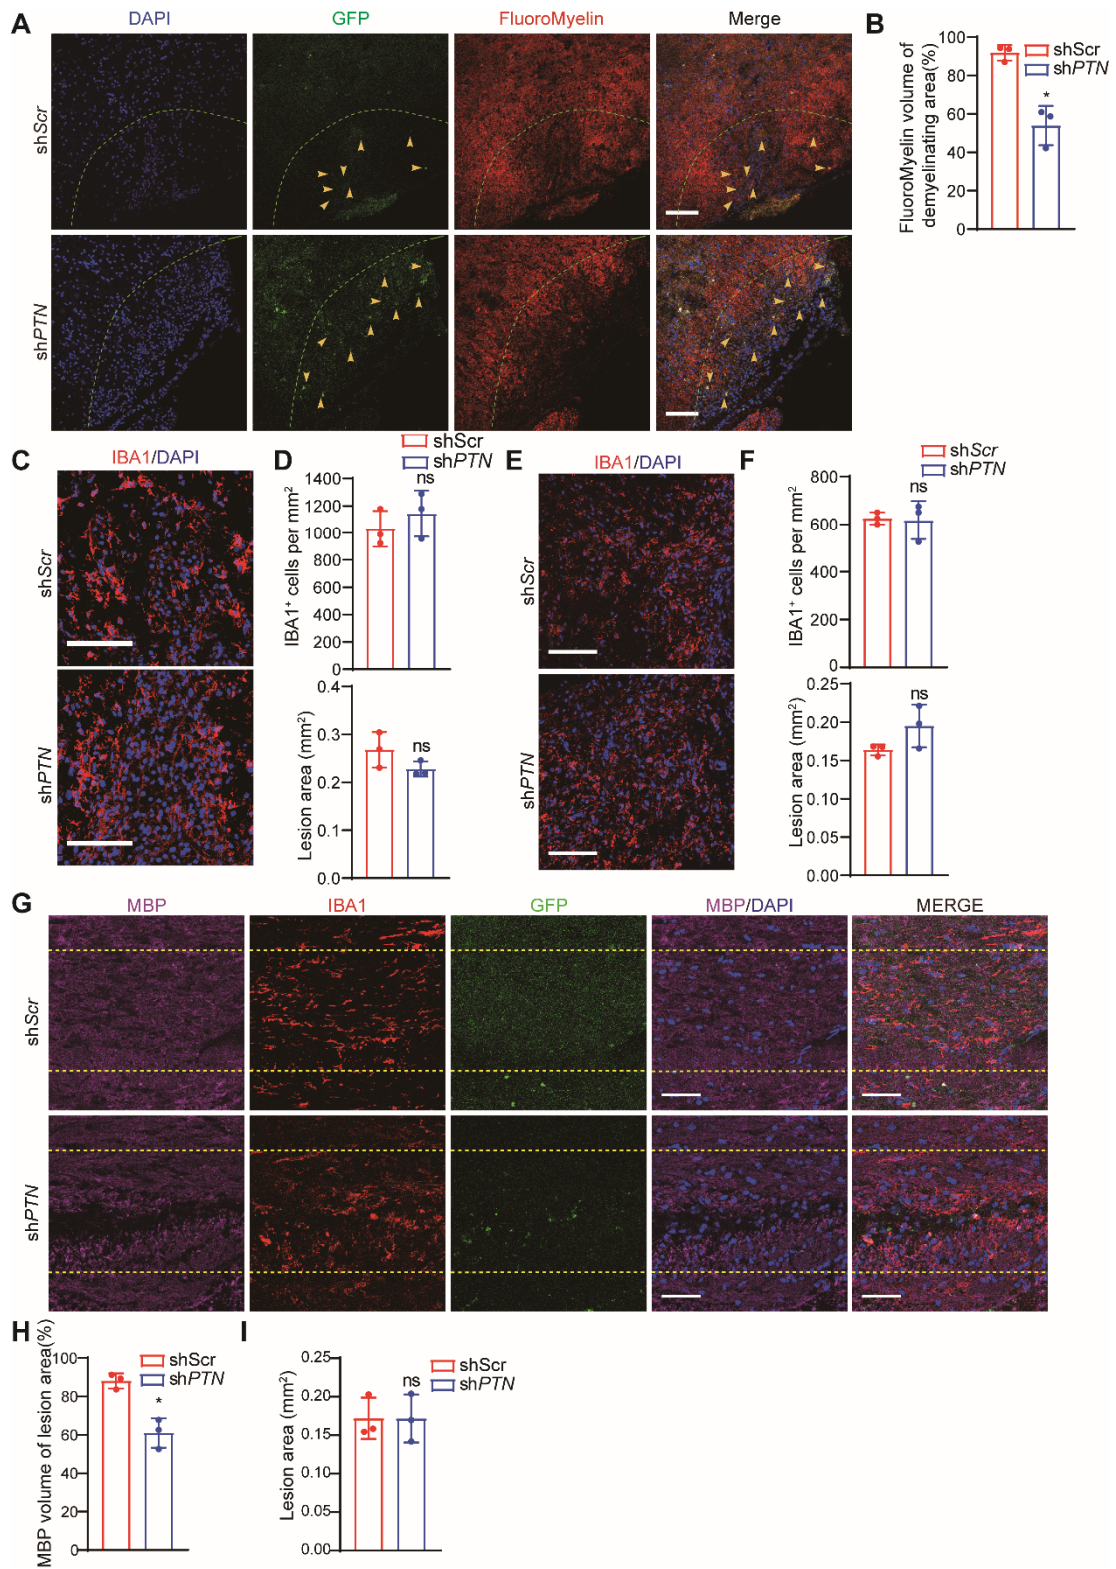



**Supplemental Figure 14. Loss of PTN impaired remyelination.**

(A) Representative images of GFP and FluoroMyelin in spinal cord lesions of mice after injection of lentivirus expressing scrambled or *PTN* shRNA at 21 dpl. Arrowheads indicated GFP<sup>+</sup> cells. Scale bars represent 100  $\mu$ m.

(B) Quantification of FluoroMyelin volume in spinal cord lesions of mice injected with lentivirus expressing scrambled or *PTN* shRNA at 21 dpl (n= 3 animals/treatment).

(C) Immunostaining of IBA1 in spinal cord lesions of mice injected with lentivirus expressing scrambled or *PTN* shRNA at 14 dpl. Scale bars represent 100  $\mu$ m.

(D) Quantification of IBA1<sup>+</sup> cells (left panel) and lesion area (right panel) in spinal cord lesions of mice injected with lentivirus expressing scrambled or *PTN* shRNA at 14 dpl (n= 3 animals/treatment).

(E) Immunostaining of IBA1 in spinal cord lesions of mice injected with lentivirus expressing scrambled or *PTN* shRNA at 21 dpl. Scale bars represent 100  $\mu$ m.

(F) Quantification of IBA1<sup>+</sup> cells (left panel) and lesion area (right panel) in spinal cord lesions of mice injected with lentivirus expressing scrambled or *PTN* shRNA at 21 dpl (n= 3 animals/treatment).

(G) Representative images of MBP, IBA1, and GFP in corpus callosum lesions of mice after injection of lentivirus expressing scrambled or *PTN* shRNA at 14 dpl. Scale bars represent 50  $\mu$ m.

(H) Quantification of MBP volume in corpus callosum lesions of mice after injection of lentivirus expressing scrambled or *PTN* shRNA at 14 dpl (n= 3 animals/treatment).

(I) Quantification of lesion area in corpus callosum lesions of mice after injection of lentivirus expressing scrambled or *PTN* shRNA at 14 dpl (n= 3 animals/treatment).

Data represent mean $\pm$ SD; \**P* <0.05; two-tailed unpaired Student's *t* test.

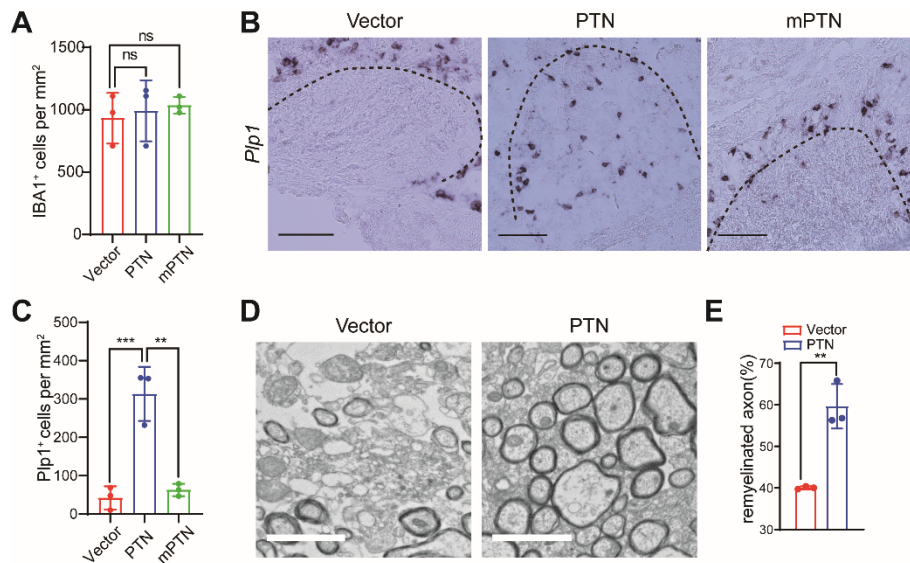

**Supplemental Figure 15. PTN accelerate remyelination after demyelinating injury.**

(A) Quantification of IBA1<sup>+</sup> cells in corpus callosum lesions of mice after injection of retrovirus expressing PTN or PTN mutant (L18&20R) at 10 dpl (n= 3 animals/treatment). Data were analyzed by 1-way ANOVA with Tukey's correction for multiple comparisons.

(B-C) *In situ* hybridization (B) and quantification (C) of *Plp1* in the spinal cord LPC lesions of mice after injection of retrovirus expressing PTN or PTN mutant (L18&20R) at 10 dpl (n= 3 animals/treatment). Scale bars represent 100 μm. Data were analyzed by 1-way ANOVA with Tukey's correction for multiple comparisons.

(D) Electron microscopy of LPC lesion from corpus callosum of mice after injection of retrovirus expressing PTN at 10 dpl. Scale bars represent 2 μm.

(E) Quantification of remyelinated axons in LPC-induced lesion in corpus callosum of mice after injection of retrovirus expressing PTN at 10 dpl (n=3 animals/treatment). Data were analyzed by two-tailed unpaired Student's *t* test. Data are represented mean ± SD; \*\**P*<0.01, \*\*\**P*<0.001.
